# Supplementary material for: How to predict hydrological effects of local land use change: how the vegetation parameterisation for short rotation coppices influences model results
Source: Copernicus journal article supplement (doi:10.5194/hess-19-3457-2015), 2015-08-07
Supplement: Supplementary file 1 [file hess-19-3457-2015-supplement.zip]

```

#
# Control file including all parameters!
# ALL parameters are constant in the 8 performed simulations described in Tabel 3!
# ONLY the vegetation parameterization differ between the 8 simulations (descriptions starts at line 841)!
# all parameterizations not needed are deleted, therefore it is not proffed if the control file is ready to be used
to run simulations!!!
# in this control file the year 2013 is simulated, a spinup period is simulated prior with another control file
(the years 2009-2012 here)!
# input data necessary for modelling are NOT provided, because of data transfer restrictions!
# a detailed description of WaSim, including the control file, are given in the WaSim manual, which can be downloaded
from http://www.wasim.ch

$set $mainpath          = # the main path has to be included here
$set $InitialStateDirectory = $mainpath//Output2012\
$set $DefaultOutputDirectory = $mainpath//Output2013\
$set $inpath_grid       = $mainpath//input\
$set $inpath_meteo      = $mainpath//input\
$set $inpath_hydro      = $mainpath//input\
# $set $inpath_ini      = $mainpath//input\

$set $time              = 1440 # duration of a time step in minutes 1440min = 1day

$set $starthour         = 24
$set $startday          = 1
$set $startmonth        = 1
$set $startyear         = 2013
$set $endhour           = 24
$set $endday            = 31
$set $endmonth          = 12
$set $endyear           = 2013

# it is important to set $outpath to an empty string in order to activate $DefaultOutputDirectory
$set $outpath           =

# readgrids : 1 = read storage grids (as SI, SSNOW,SLIQ...) from hard disk, 0=generate and initialize with 0
$set $readgrids         = 1

# read grids for dynamic phenology -> usually chilling grid should be read in if available because otherwise thermal
time method will be applied and not the sequential model
$set $DPreadgrids       = 1 # should be 1 (manual p.165)

```

```
# == end of protected part ==
```

```
$set $year          = 13 # this is year
```

```
# it is important to set $outpath to an empty string in order to activate $DefaultOutputDirectory
```

```
$set $outpath      =
```

```
$set $grid         = plotReiff
```

```
$set $stack        = plotReiff_stack
```

```
$set $suffix       = grd
```

```
$set $code         = s # as statistic file
```

```
# variables for standardgrids
```

```
# first section: grids, which differ for different subdivisions of the basin
```

```
$set $zone_grid    = $grid//.e1
```

```
$set $subcatchments = $grid//.e2
```

```
$set $flow_time_grid = $grid//.fzs
```

```
$set $river_links_grid = $grid//.lnk
```

```
$set $regio_grid   = $grid//.reg
```

```
# second section: grids, which doesn't depend on subdivision (only pixel-values are of interest)
```

```
$set $elevation_model = $grid//.dhm
```

```
$set $RelCellArea_grid = $grid//.rca
```

```
$set $CellSizeX_grid = $grid//.csx
```

```
$set $CellSizeY_grid = $grid//.csy
```

```
$set $slope_grid = $grid//.slp
```

```
$set $FlowDirection_grid = $grid//.fld
```

```
$set $aspect_grid = $grid//.exp
```

```
$set $land_use_grid = $grid//.use
```

```
$set $ice_firn_grid = $grid//.glc
```

```
$set $field_capacity_grid = $grid//.nfk
```

```
$set $ATBgrid = $grid//.atb
```

```
$set $hydr_cond_grid = $grid//.k
```

```
$set $soil_types = $grid//.soil
```

```
$set $sky_view_factor_grid = $grid//.hor
```

```
$set $drain_depth_grid = $grid//.drn
```

```
$set $drain_distance_grid = $grid//.dis
```

```
$set $irrigationcodes = $grid//.irr
```

```
$set $max_pond_grid = $grid//.maxpond
```

```
$set $clay_depth_grid = $grid//.cly
```

```

$set $river_depth_grid      = $grid//.dep
$set $river_width_grid      = $grid//.wit
$set $tracer_1              = $grid//.c1
$set $tracer_2              = $grid//.c2
$set $tracer_3              = $grid//.c3
$set $tracer_4              = $grid//.c4
$set $tracer_5              = $grid//.c5
$set $tracer_6              = $grid//.c6
$set $tracer_7              = $grid//.c7
$set $tracer_8              = $grid//.c8
$set $tracer_9              = $grid//.c9
$set $kolmationsgrid        = $grid//.kol
$set $gw_kx_1_grid          = $grid//.kx1
$set $gw_kx_2_grid          = $grid//.kx2
$set $gw_kx_3_grid          = $grid//.kx3
$set $gw_ky_1_grid          = $grid//.ky1
$set $gw_ky_2_grid          = $grid//.ky2
$set $gw_ky_3_grid          = $grid//.ky3
$set $gw_bound_h_1_grid     = $grid//.bh1
$set $gw_bound_h_2_grid     = $grid//.bh2
$set $gw_bound_h_3_grid     = $grid//.bh3
$set $gw_bound_q_1_grid     = $grid//.bq1
$set $gw_bound_q_2_grid     = $grid//.bq2
$set $gw_bound_q_3_grid     = $grid//.bq3
$set $aquiferthick1         = $grid//.aq1
$set $aquiferthick2         = $grid//.aq2
$set $aquiferthick3         = $grid//.aq3
$set $gw_storage_coeff_1    = $grid//.s01
$set $gw_storage_coeff_2    = $grid//.s02
$set $gw_storage_coeff_3    = $grid//.s03
$set $gw_kolmation_1        = $grid//.gk1
$set $gw_kolmation_2        = $grid//.gk2
$set $gw_kolmation_3        = $grid//.gk3
$set $lake_grid             = $grid//.lak
$set $taucrit_grid          = $grid//.tau
$set $ThawCoeffPermaFrost   = $grid//.alpha
$set $T_lower_boundary_grid = $grid//.tlowbdry
$set $debris_on_glaciers    = $grid//.debris

# grids for surface hydrology modules
$set $forcingunitsgrid1     = forc1//$grid//.//$suffix

```

```
$set $TStartPhenoGrid1 = phen1//$grid//.//$suffix
$set $chillingunitsgrid1 = chill1//$grid//.//$suffix
$set $FStargrid1 = fstar1//$grid//.//$suffix
$set $forcingunitsgrid2 = forc2//$grid//.//$suffix
$set $TStartPhenoGrid2 = phen2//$grid//.//$suffix
$set $chillingunitsgrid2 = chill2//$grid//.//$suffix
$set $FStargrid2 = fstar2//$grid//.//$suffix
$set $forcingunitsgrid3 = forc3//$grid//.//$suffix
$set $TStartPhenoGrid3 = phen3//$grid//.//$suffix
$set $chillingunitsgrid3 = chill3//$grid//.//$suffix
$set $FStargrid3 = fstar3//$grid//.//$suffix
$set $albedo = albe//$grid//.//$suffix
$set $soilstoragegrid = sb_//$grid//.//$suffix
$set $throughfall = qi_//$grid//.//$suffix
$set $snowcover_outflow = qsno//$grid//.//$suffix
$set $melt_from_snowcover = qsme//$grid//.//$suffix
$set $days_snow = sday//$grid//.//$suffix
$set $snow_age = sage//$grid//.//$suffix
$set $snow_rate = snow//$grid//.//$suffix
$set $rain_rate = rain//$grid//.//$suffix
$set $firn_melt = qfir//$grid//.//$suffix
$set $ice_melt = qice//$grid//.//$suffix
$set $preci_grid = prec//$grid//.//$suffix
$set $preci_grid1 = prec1//$grid//.//$suffix
$set $preci_grid2 = prec2//$grid//.//$suffix
$set $irrig_grid = irri//$grid//.//$suffix
$set $etr2etpgrid = er2ep//$grid//.//$suffix
$set $tempegrid = temp//$grid//.//$suffix
$set $tempegrid1 = temp1//$grid//.//$suffix
$set $tempegrid2 = temp2//$grid//.//$suffix
$set $windgrid = wind//$grid//.//$suffix
$set $sunshinegrid = ssd_//$grid//.//$suffix
$set $radiationgrid = rad_//$grid//.//$suffix
$set $humiditygrid = humi//$grid//.//$suffix
$set $vaporgrid = vapo//$grid//.//$suffix
$set $ETPgrid = etp_//$grid//.//$suffix
$set $EIPgrid = eip_//$grid//.//$suffix
$set $ETRgrid = etr_//$grid//.//$suffix
$set $EVAPgrid = evap//$grid//.//$suffix
$set $EVARgrid = evar//$grid//.//$suffix
$set $ETRSgrid = etrs//$grid//.//$suffix
```

```

$set $SSNOgrid      = ssno//$grid//.//$suffix
$set $SLIQgrid      = sliq//$grid//.//$suffix
$set $SSTOgrid      = ssto//$grid//.//$suffix
$set $sat_def_grid  = sd_//$grid//.//$suffix
$set $SUZgrid       = suz_//$grid//.//$suffix
$set $SIFgrid       = sif_//$grid//.//$suffix
$set $EIgrid        = ei_//$grid//.//$suffix
$set $SIgrid        = si_//$grid//.//$suffix
$set $ExpoCorrgrid  = exco//$grid//.//$suffix
$set $Tcorrgrid     = tcor//$grid//.//$suffix
$set $Shapegrid     = shap//$grid//.//$suffix
$set $INFEXgrid     = infx//$grid//.//$suffix
$set $SATTgrid      = satt//$grid//.//$suffix
$set $Nagrid        = na_//$grid//.//$suffix
$set $SSPgrid       = ssp_//$grid//.//$suffix
$set $Peakgrid      = peak//$grid//.//$suffix
$set $SBiagrid      = sbia//$grid//.//$suffix
$set $fcia_grid     = nfki//$grid//.//$suffix
$set $tavq_grid     = tavq//$grid//.//$suffix

```

```

# now variables for unsaturated zone model

```

```

$set $SB_1_grid     = sb05//$grid//.//$suffix
$set $SB_2_grid     = sb1_//$grid//.//$suffix
$set $ROOTgrid      = wurz//$grid//.//$suffix
$set $QDgrid        = qd_//$grid//.//$suffix
$set $QIgrid        = qifl//$grid//.//$suffix
$set $GWdepthgrid   = gwst//$grid//.//$suffix
$set $GWthetagrid   = gwth//$grid//.//$suffix
$set $GWNgrid       = gwn_//$grid//.//$suffix
$set $UPRISEgrid    = uprs//$grid//.//$suffix
$set $PERCOLgrid    = perc//$grid//.//$suffix
$set $GWLEVELgrid   = gwlv//$grid//.//$suffix
$set $QDRAINgrid    = qdrn//$grid//.//$suffix
$set $QBgrid        = qb_//$grid//.//$suffix
$set $GWINgrid      = gwin//$grid//.//$suffix
$set $GWEXgrid      = gwex//$grid//.//$suffix
$set $act_pond_grid = pond//$grid//.//$suffix
$set $MACROINFgrid   = macr//$grid//.//$suffix
$set $SUBSTEPSgrid   = step//$grid//.//$suffix

```

```

$set $SnowFreeDaysGrid = sfre//$grid//.//$suffix

```

```
$set $SnowCoverDaysGrid = scov//$grid//.//$suffix
$set $ThawDepthGrid      = thdp//$grid//.//$suffix
$set $ThawDepthGridTMod = thaw//$grid//.//$suffix
```

#### # variables for groundwater modeling

```
$set $flowx1grid = gwx1//$grid//.//$suffix
$set $flowx2grid = gwx2//$grid//.//$suffix
$set $flowx3grid = gwx3//$grid//.//$suffix
$set $flowy1grid = gwy1//$grid//.//$suffix
$set $flowy2grid = gwy2//$grid//.//$suffix
$set $flowy3grid = gwy3//$grid//.//$suffix
$set $head1grid  = gwh1//$grid//.//$suffix
$set $head2grid  = gwh2//$grid//.//$suffix
$set $head3grid  = gwh3//$grid//.//$suffix
$set $GWbalance1grid = gwbalance1//$grid//.//$suffix
$set $GWbalance2grid = gwbalance2//$grid//.//$suffix
$set $GWbalance3grid = gwbalance3//$grid//.//$suffix
```

#### # result grids for surface routing model

```
$set $surfspeed_grid = sfcv//$grid//.//$suffix
$set $surfflux_grid  = sflx//$grid//.//$suffix
```

#### # some new stacks and grids for the dynamic glacier model

```
$set $firn_WE_stack = glfirn//$stack//.//$suffix
$set $GlacierMassBalance = glmb//grid//.//$suffix
$set $OldGlacierMassBalance = glmb_old//grid//.//$suffix
$set $glacierizedCells_grid = glc_//grid//.//$suffix
$set $glacier_codes_grid = glid//grid//.//$suffix
```

#### # result-stacks for Unsatzonmodel

```
$set $Thetastack = teth//$stack//.//$suffix
$set $hydraulic_heads_stack = hhyd//$stack//.//$suffix
$set $geodetic_altitude_stack = hgeo//$stack//.//$suffix
$set $flowstack = qu_//$stack//.//$suffix
$set $concstack = conc//$stack//.//$suffix
```

#### # result-stacks for temperatures in Unsatzonmodel

```
$set $Temperaturestack = tsoil//stack//.//$suffix
```

#### # parameters for interpolation of meteorological input data

```
$set $SzenUse = 0
$set $IDWmaxdist = 200000
```

```
$set $IDWweight      = 2
$set $Anisoslope     = 0.0
$set $Anisotropie    = 1.0
```

```
# explanation of writegrid and outputcode some lines below
```

```
$set $Writegrid      = 3
$set $Writestack     = 3
```

```
$set $once_per_interval = 5001
$set $avrg_per_24Invs   = 2001
$set $sum_per_24Invs    = 4001
$set $routing_code     = 5001
```

```
# Writegrid : max. 4 digits (nnnn)
```

```
#
#   only if writegrid >= 1000: 1. digit (1nnn, or 2nnn)
#   0 = no vegetation period based grid is written
#   1 = sum grid is written for vegetation period (summing up each value as long as this cells vegetation period
is active)
#   2 = average value grid is written for vegetation period (summing up each value as long as this cells vegetation
period is active)
#   only if writegrid >= 100: 2. digit (n1nn, or n2nn or n3nn or 1nn..3nn -> leading digits may be omitted))
#   0 = no minimum or maximum grid is written
#   1 = minimum grid is written (minimum value for each of the grid cells over the entire model period)
#   2 = maximum grid is written (maximum value for each of the grid cells over the entire model period)
#   3 = both grids are written (minimum and maximum value for each of the grid cells over the entire model period)
#   only if Writegrid >= 10: 3rd digit: sums or means (1n ... 8n or n1n..n8n or nn1n..nn8n -> leading digits
may be omitted))
#   0 = no sum grid will be written
#   1 = one sum grid will be written at the end of the model run
#   2 = one sum grid per model year
#   3 = one sum grid per model month
#   4 = one sum grid per day (only, if timestep < 1 day)
#   5 = one mean value grid at the end of the model run
#   6 = one mean value grid per model year
#   7 = one mean value grid per month
#   8 = one mean value grid per day
#   last digit (nnn1 .. nnn5 or nn1..nn5 or n1..n5 or 1..5 -> leading digits may be omitted) (for actual values,
not for Sums or means)
```

```

#         1 = (over)write each timestep into the same grid (for security in case of model crashes)
#         2 = write grids each timestep to new files, the name is build from the first 4 letters
#             of the regular grid name and then from the number of month, day and hour (hoer as file extension).
#             example: tempm500.grd will become prec0114.07 for 14.January, 7:00.
#         3 = only the last grid of the model run will be stored
#         4 = the grid from the last hour of each day (24:00) will be stored (for each day the same file will be
overwritten)
#         5 = like 4, but each day a new grid file is created (like for code 2)
#         6 = actual grid at the end of each month
#         7 = actual grid at the end of each year
#         8 = write immediately after reading the grid from file and filling missing values. This is used for an
automated filling of missing values only. Should not be used productive
#
# outputcode (for statistic files for zones or subcatchments)
#
# the Codes behind the names of the statistic files have the meaning of:
# <1000    : no output
# 1<nnn>   : spatial mean values for the entire basin, averaged in time over <nnn> intervals (timesteps)
# 2<nnn>   : spatial mean values for all zones (subbasin) and for the entire basin, averaged in time over <nnn> intervals
(timesteps)
# 3<nnn>   : spatial means for the entire basin, added up in time over <nnn> intervals (timesteps)
# 4<nnn>   : spatial means for all zones (subbasin) and for the entire basin, added up in time over <nnn> intervals
(timesteps)
# 5<nnn>   : spatial means for the entire basin and for those subbasins which are specified in the output-list, averaged
in time over <nnn> intervals
# 6<nnn>   : spatial means for the entire basin and for those subbasins which are specified in the output-list, added
up in time over <nnn> intervals
#
# example:
# 2001 = per timestep for all subcatchments (and for the entire basin) one (spatially averaged) value,
# 2004 = each 4 time steps one averaged value over the last 4 time steps for all subcatchments and for the entire
basin,
# 4024 = Sums of the mean subcatchment/entire basin values of the timesteps over 24 timesteps (e.g. daily rain
sums for subcatchments),
# 3120 = averaged values (over 120 time steps!) only for the entire basin (spatially averaged)
# 5012 = averaged values (over 12 timesteps) as spatial averages for the entire basin and for each of the subbasins
specified in the output-list

[output_list] # FR
1             # number of subbasins which are scheduled for output (is only of interest, if the code for the statistic
files are >5000)

```



10

### [output\_interval]

```
30          # increment of time steps until an output to the screen is done (24 = each day one output, if time
steo = 1h)
1          # warning level for interpolation (no station within search radius)
0          # unit of routed discharge (0=mm/timestep, 1=m3/s)
0          # minutes from the hour-entry in the input data files until the end
# of the time step is reached 0 if the end of time step is given like "84 01 01 01",
# but it should be $time if the begin is given like in "84 01 01 00"
WriteDoubleGrids = 0
WriteAsciiGrids = 0          # 0 if grids should be written in WaSiM native format, 1 if
in ESRI ASCII format
InitialStateDirectory = $InitialStateDirectory          # if using this parameter, all state grids as well as the
storage_richards.ftz file will be expected in that directory for reading
DefaultOutputDirectory = $DefaultOutputDirectory          # this is the default output directory, all output is written
to unless the given filename contains an absolute path
# there are some exceptions, though: for external coupling no default output path is used
# relative pathnames may be used as well.
# for compatibility reasons with older control files and WaSiM versions, both directories will only be used if the
given filename has no absolute path,
# so in order to use the new features, all $outpath uses should be reviewed and removed if necessary (or the variable
should be set to an empty string)
```

### [coordinates]

```
51.4          # geogr. latitude (center of the basin -> for radiation calculations)
9.98          # geogr. longitude (center of the basin)
15.0          # meridian according to the official time (middle europe: 15) (east: 0 ... +180 degree, west: 0 ...
-180 (or 360 ... 180)
1          # time shift of Meteo-data-time with respect to the true local time (mean sun time)
# e.g.: if meteo-data are stored in UTC-time and the time meridian is 15 east (central europe),
# than the local time is 1 hour later than the time in the meteo-data-file, so 1 hour has to be added to the time
from this file
# this is important for calculation of sunshine duration and radiation
```

### [region\_transition\_distance]

```
10000 # in m
```

### [soil\_surface\_groundwater\_substeps]

```
12 # number of sub time steps for the module group surface routing, unsaturated zone model and groundwater model
```

```
(and accumulation of real evapotranspiration)
# Values to start with are 1 (default), 2
# (half of the common time step), 3 etc. Please be carefull not to set too high values here since the model
# performance will go down dramatically, since unsatzonmodel and surface routing are called each
# time!
```

### [elevation\_model]

```
$inpath_grid//$elevation_model      # grid with the digital elevation data
```

### [zone\_grid]

```
$inpath_grid//$zone_grid             # grid with Zone codes
```

```
$set $lai_grid = lai_//$grid//.//$suffix
$set $z0_grid = z0_//$grid//.//$suffix
$set $root_grid = root_//$grid//.//$suffix
$set $rse_grid = rse_//$grid//.//$suffix
$set $rsi_grid = rsi_//$grid//.//$suffix
$set $rsc_grid = rsc_//$grid//.//$suffix
$set $albedo_grid = albedo_//$grid//.//$suffix
$set $vcf_grid = vcf_//$grid//.//$suffix
```

```
$set $lai_stat = lai_//$grid//.//$code//$year
$set $z0_stat = z0_//$grid//.//$code//$year
$set $root_stat = root_//$grid//.//$code//$year
$set $rse_stat = rse_//$grid//.//$code//$year
$set $rsi_stat = rsi_//$grid//.//$code//$year
$set $rsc_stat = rsc_//$grid//.//$code//$year
$set $albedo_stat = albedo_//$grid//.//$code//$year
$set $vcf_stat = vcf_//$grid//.//$code//$year
```

```
# there is a simple possibility starting with WaSiM 8.10.03 to do the nearest neighbor filling permanently: simply
set the writecode for the standardgrid to 8 and the grid
# will be written to the default output directory with it's original name but an additional suffix "filled". Once
thsi grid is written, it can be converted to binary optionally and
# used as input grid (without fillcode = 1 then).
```

### [standard\_grids]

```
5                                     # number of standard grids
$inpath_grid//$albedo_grid          albedo          fillcode = 0  defaultValue = 0.2 writecode = 3 readcode = 0
```

```

outname = $outpath//$albedo_grid statfile = $outpath//$albedo_stat statcode = $once_per_interval
$inpath_grid//$land_use_grid          landuse          fillcode = 1 # writecode = 8 readcode = 1 outname
= $outpath//$land_use_grid # grid with land use data (will be written out after reading in for getting gthe filles
values)
$inpath_grid//$subcatchments          zonegrid_soilmodel      1          # zone grid for the runoff generation
model (and unstaured zone model)
$inpath_grid//$soil_types             soil_types          fillcode = 1 # writecode = 8 readcode = 1 outname
= $outpath//$soil_types              # soil types as codes for the soil table
$inpath_grid//$T_lower_boundary_grid  T_Lower_Boundary_Condition fillcode = 0    defaultValue = 10  writecode =
8 readcode = 0

```

# variable grids are used by more than one module or can be changed (like albedo and soil storage)

```

$set $SurfStorSiltUp      = sfstsu//$grid//.$suffix
$set $pondgridtopmodel    = pond_top//$grid//.$suffix
$set $VegetationStart     = vegstart//$grid//.$suffix
$set $VegetationStop      = vegstop//$grid//.$suffix
$set $VegetationDuration  = vegduration//$grid//.$suffix

```

#### [variable\_grids]

```

4          # Number of variable grids to read
$outpath//$forcingunitsgrid1      SumOfForcingUnits1      0 -1
$Writegrid
$DPreadgrids
$outpath//$TStartPhenoGrid1      Pheno_start1          0 -1
$Writegrid
$DPreadgrids
$outpath//$chillingunitsgrid1     SumOfChillingUnits1     0 -1
$Writegrid
$DPreadgrids
$outpath//$FStargrid1            FStar_ForcingThreshold1 0 -1
$Writegrid
$DPreadgrids

```

#### [model\_time]

```

$starthour      # start hour
$startday       # start day
$startmonth     # start month
$startyear      # start year
$endhour        # end hour
$endday         # end day

```

```
$endmonth      # end month
$endyear       # end year
```

### [meteo\_data\_count]

5

### [meteo\_names]

```
temperature
wind_speed
precipitation
global_radiation
air_humidity
```

# methods:

```
# 1 = idw
# 2 = regress
# 3 = idw+regress
# 4 = thiessen
# 5 = bilinear
# 6 = bilinear gradients and residuals linearly combined,
# 7 = bicubic spline,
# 8 = bicubic splines of gradients and residuals linearly combined,
# 9 = read grids according to the name in a grid list file,
# 10 = regression from Stationdata instead from outputfile of regr.exe (similar to method 1, except that no station
selection may be applied))
# 11 = regression and IDW from station data (equivalent to method 3, except that no station selection may be applied)
# 12 = Thiessen with given lapse rate (as single next line parameter or with multiple parameters lower lapse rate,
upper limit, upper lapse rate, type (P-type or T-type , important for continuous or discontinuous data modelling)
```

### [temperature]

4

```
$inpath_meteo//Tmean.tat AdditionalColumns=0
else ignored)
```

```
# $inpath_meteo//.out
```

820 1400 200 1 300

```
tolerance [m], overlap [0/1 for true/false], clusterlimit [m]
```

```
$outpath//$tempegrid
```

```
names of daily, monthly, yearly sums or averages)
```

5//\$Writegrid

# methods, see comments above

# file name with station data (if method = 1, 3 or 4,

# file name with regression data (if method = 2 or 3)

# lower inversion [m asl], upper inversion [m asl],

# name of the output grid (is also used for deriving

# 0, if no grid-output is needed, else one of the codes

described above

```
1.0
$outpath//temp//$grid//.//$code//$year $once_per_interval
averaged values per time step and subcatchment...)
9998
this values or lesser the negative value are nodata
$IDWweight
0.5
IDW=interpolation in the result
$IDWmaxdist
interpolation cell
$Anisoslope
(-90 ... +90 degree, mathem. positive)
$Anisotropie
anisotropy-ellipsis
-40
-40
40
40
the upper limit
$SzenUse
scenarios
1
3=percentual change
4

[wind_speed]
4
5=bilinear 6=bilinear gradients and residuals linarly combined
$inpath_meteo//Windmean.tat AdditionalColumns=0
else ignored)
# $inpath_meteo//.out
820 1400 200 1 300
tolerance [m], overlap [0/1 for true/false], clusterlimit [m]
$outpath//$windgrid
names of daily, monthly, yearly sums or averages)
5//$Writegrid
described above
1.0
$outpath//wind//$grid//.//$code//$year $once_per_interval
averaged values per time step and subcatchment...)
```

```
# correction faktor for results
# file name for the statistic output (statially
# error value: all data in the input file greater than
# weighting of the reciprocal distance for IDW
# for interpolation method 3: relative weight of
# max. distance of stations to the actual
# slope of the mean axis of the anisotropy-ellipsis
# ratio of the short to the long axis of the
# lower limit of interpolation results
# replace value for results below the lower limit
# upper limit for interpolation results
# replace value for results with larger values than
# 1=use scenario data for correction, 0=dont use
# 1=add scenarios, 2=multiply scenarios,
# number of scenario cells
# method: 1=idw 2=regress 3=idw+regress 4=thiessen
# file name with station data (if method = 1, 3 or 4,
# file name with regression data (if method = 2 or 3)
# lower inversion [m asl], upper inversion [m asl],
# name of the output grid (is also used for deriving
# 0, if no grid-output is needed, else one of the codes
# correction faktor for results
# file name for the statistic output (statially
```

```

9998
this values or lesser the negative value are nodata
$IDWweight
0.50
IDW-interpolation in the result
$IDWmaxdist
interpolation cell
$Anisoslope
(-90 ... +90 degree, mathem. positive)
$Anisotropie
anisotropy-ellipsis
0
0
90
90
the upper limit
$SzenUse
scenarios
3
change
4

```

### [precipitation]

```

4
5=bilinear 6=bilinear gradients and residuals linearly combined
$inpath_meteo//Niedsum.tat AdditionalColumns=0
else ignored)
# $inpath_meteo//.out
700 1400 400 1 300
tolerance [m], overlap [0/1 for true/false], clusterlimit [m]
$outpath//$preci_grid
names of daily, monthly, yearly sums or averages)
1//$Writegrid
described above
1.0
$outpath//prec//$grid//.//$code//$year $once_per_interval
averaged values per time step and subcatchment...)
9998
this values or lesser the negative value are nodata
$IDWweight

```

```

# error value: all data in the input file greater than

# weighting of the reciprocal distance for IDW
# for interpolation method 3: relative weight of

# max. distance of stations to the actual

# slope of the mean axis of the anisotropy-ellipsis

# ratio of the short to the long axis of the

# lower limit of interpolation results
# replace value for results below the lower limit
# upper limit for interpolation results
# replace value for results with larger values than

# 1=use scenario data for correction, 0=dont use

# 1=add scenarios, 2=multiply scenarios, 3=percentual

# number of scenario cells

# method: 1=idw 2=regress 3=idw+regress 4=thiessen
# file name with station data (if method = 1, 3 or 4,

# file name with regression data (if method = 2 or 3)
# lower inversion [m asl], upper inversion [m asl],

# name of the output grid (is also used for deriving

# 0, if no grid-output is needed, else one of the codes

# correction faktor for results
# file name for the statistic output (statially

# error value: all data in the input file greater than

# weighting of the reciprocal distance for IDW

```

```

0.5
IDW-interpolation in the result
$IDWmaxdist
interpolation cell
$Anisoslope
(-90 ... +90 degree, mathem. positive)
$Anisotropie
anisotropy-ellipsis
0.1
0
900
900
the upper limit
$SzenUse
scenarios
2
change
1

[global_radiation]
4 # FR 1
5=bilinear 6=bilinear gradients and residuals linarly combined
$inpath_meteo//Radmean.tat AdditionalColumns=0
else ignored)
# $inpath_meteo//.out
820 1400 200 1 300
tolerance [m], overlap [0/1 for true/false], clusterlimit [m]
$outpath//$radiationgrid
names of daily, monthly, yearly sums or averages)
5//$Writegrid
described above
1.0
$outpath//rad_//$grid//.//$code//$year $once_per_interval
averaged values per time step and subcatchment...)
19998
this values or lesser the negative value are nodata
$IDWweight
0.5
IDW-interpolation in the result
$IDWmaxdist
interpolation cell

# for interpolation method 3: relative weight of
# max. distance of stations to the actual
# slope of the mean axis of the anisotropy-ellipsis
# ratio of the short to the long axis of the
# lower limit of interpolation results
# replace value for results below the lower limit
# upper limit for interpolation results
# replace value for results with larger values than
# 1=use scenario data for correction, 0=dont use
# 1=add scenarios, 2=multiply scenarios, 3=percentual
# number of scenario cells

# method: 1=idw 2=regress 3=idw+regress 4=thiessen
# file name with station data (if method = 1, 3 or 4,
# file name with regression data (if method = 2 or 3)
# lower inversion [m asl], upper inversion [m asl],
# name of the output grid (is also used for deriving
# 0, if no grid-output is needed, else one of the codes
# correction faktor for results
# file name for the statistic output (statially
# error value: all data in the input file greater than
# weighting of the reciprocal distance for IDW
# for interpolation method 3: relative weight of
# max. distance of stations to the actual

```

```

$Anisoslope
(-90 ... +90 degree, mathem. positive)
$Anisotropie
anisotropy-ellipsis
0
0
19999
16500
the upper limit
$SzenUse
scenarios
1
change
4

[air_humidity]
4
5=bilinear 6=bilinear gradients and residuals linearly combined
$inpath_meteo//Luftfeuchte.tat AdditionalColumns=0
else ignored)
# $inpath_meteo//.out
900 1500 300 1 150
tolerance [m], overlap [0/1 for true/false], clusterlimit [m]
$outpath//$humiditygrid
names of daily, monthly, yearly sums or averages)
5//$Writegrid
described above
1.0
$outpath//humi//$grid//.//$code//$year $once_per_interval
averaged values per time step and subcatchment...)
9998
this values or lesser the negative value are nodata
$IDWweight
0.5
IDW-interpolation in the result
$IDWmaxdist
interpolation cell
$Anisoslope
(-90 ... +90 degree, mathem. positive)
$Anisotropie
anisotropy-ellipsis

# slope of the mean axis of the anisotropy-ellipsis
# ratio of the short to the long axis of the
# lower limit of interpolation results
# replace value for results below the lower limit
# upper limit for interpolation results
# replace value for results with larger values than
# 1=use scenario data for correction, 0=dont use
# 1=add scenarios, 2=multiply scenarios, 3=percentual
# number of scenario cells
# method: 1=idw 2=regress 3=idw+regress 4=thiessen
# file name with station data (if method = 1, 3 or 4,
# file name with regression data (if method = 2 or 3)
# lower inversion [m asl], upper inversion [m asl],
# name of the output grid (is also used for deriving
# 0, if no grid-output is needed, else one of the codes
# correction faktor for results
# file name for the statistic output (statially
# error value: all data in the input file greater than
# weighting of the reciprocal distance for IDW
# for interpolation method 3: relative weight of
# max. distance of stations to the actual
# slope of the mean axis of the anisotropy-ellipsis
# ratio of the short to the long axis of the

```



```

0.01                                # lower limit of interpolation results
0.01                                # replace value for results below the lower limit
1.0                                 # upper limit for interpolation results
1.0                                 # replace value for results with larger values than
the upper limit
$SzenUse                            # 1=use scenario data for correction, 0=dont use
scenarios                           # 1=add scenarios, 2=multiply scenarios, 3=percentual
3
change                             # number of scenario cells
1

# ----- parameter for model components -----

[RegionalSuperposition]
0                                # 0=ignore this module, 1 = run the module

[precipitation_correction]
1                                # 0=ignore this module, 1 = run the module
0.0                               # Snow-rain-temperature
1.02                              # liquid:  b in:  y = p(ax + b)
0.01                              # liquid:  a in:  y = p(ax + b) = 1% more per m/s + 0.5% constant
1.15                              # Snow:     b in:  y = p(ax + b)
0.15                              # Snow:     a in:  y = p(ax + b) = 15% more per m/s + 45% constant

# corretion factors for direct radiation are calculated
# if the cell is in the shadow of another cell, or if a cell is not in the sun (slope angle!)
# then the factor is 0.
# control_parameter: 1 = radiation correction WITH shadow WITHOUT temperature correction
#                    2 = radiation correction WITH shadow WITH temperature correction
#                    3 = radiation correction WITHOUT shadow WITHOUT temperature correction,
#                    4 = radiation correction WITHOUT shadow WITH Temperatur

[radiation_correction]
1                                # 0=ignore this module, 1 = run the module
$time                           # duration of a time step in minutes
2                                # control parameter for radiation correction (see above)
$outpath//$Tcorrgrid            # name of the grids with the corrected temperatures
5//$Wwritegrid                  # Wwritegrid for corrected temperatures
20                              # factor x for temperature correction x * (-1.6 .... +1.6)
$outpath//$ExpoCorrgrid         # name of the grids with the correction factors for the direct radiation

```

```

5//$Writegrid          # Writegrid
$outpath//$Shapegrid   # name of the grids for codes 1 for theor. shadow, 0 for theor. no shadow
(day; assumed: SSD=1.0)
5//$Writegrid          # Writegrid
1                      # interval counter, after reaching this value, a new correction is
calculated (3=all 3 hours a.s.o.)
1                      # Spitting of the interval, usefull for time step=24 hours (then: split=24,
-> each hour one correction calculation)

```

### [evapotranspiration]

```

1                      # 0=ignore this module, 1 = run the module
$time                 # duration of a time step in minutes
1                      # Method: 1=Penman-Monteith, 2=Hamon (only daily), 3=Wendling (only daily)
4= Haude (only daily)
0.2  0.2  0.35  0.4  0.4  0.4  0.4  0.4  0.35  0.2  0.2  0.2      # PEC correction factor for HAMON-evapotranspiration
0.20 0.20 0.21 0.29 0.29 0.28 0.26 0.25 0.22 0.22 0.20 0.20    # fh (only for method 4: Haude) monthly values (Jan
... Dec) (here: for Grass)
0.5                   # fk -> factor for Wendling-evapotranspiration (only
for Method = 3)
$outpath//$ETPgrid     # result grid for pot. evapotranspiration in mm/dt
$Writegrid             # 0, if no grid-output is needed, else one of the codes
described above
$outpath//etp_//$grid//.//$code//$year $once_per_interval      # statisticfile for Teilgebiete of pot.
evapo-Transpiration
$outpath//$ETRgrid     # result grid for real evapotranspiration in mm/dt
$Writegrid             # 0, if no grid-output is needed, else one of the codes
described above
$outpath//etr_//$grid//.//$code//$year $once_per_interval      # statistic for subcatchments (zones) of the real
evapotranspiration
$outpath//$EVAPgrid     # result grid for real evapotranspiration in mm/dt
$Writegrid             # 0, if no grid-output is needed, else one of the codes
described above
$outpath//evap_//$grid//.//$code//$year $once_per_interval      # statistic for subcatchments (zones) of the potential
evaporation
$outpath//$EVARgrid     # result grid for real evapotranspiration in mm/dt
$Writegrid             # 0, if no grid-output is needed, else one of the codes
described above
$outpath//evar_//$grid//.//$code//$year $once_per_interval      # statistic for subcatchments (zones) of the real
evaporation
$outpath//$ETRSgrid     # result grid for real snow evapotranspiration in
mm/dt

```

```

$Writegrid
described above
$outpath//etrs//$grid//.//$code//$year $once_per_interval
evaporation
$outpath//$EIPgrid
mm/dt
$Writegrid
described above
$outpath//eip_//$grid//.//$code//$year $once_per_interval
evaporation
$outpath//rgex//$grid//.//$code//$year $once_per_interval
radiation
+0.23 +1.77 -2.28 +1.28
+ c3*SSD^2 + c4*SSD^3
+0.072 -0.808 +2.112 -0.239
+ x3*RG^2 + x4*RG^3
0.88 0.05
dPhi) (summer phi = phi-dphi, winter phi=phi+dphi)
1654.0
daily temperature amplitude with altitude [m]
3.3 4.4 6.1 7.9 9.4 10.0 9.9 9.0 7.8 6.0 4.2 3.2 # monthly values of the max. daily T-amplitudes (for
0 m.a.s.l)
0.62 0.1
to the mean day-temperature
ddt) to get the mean temperature of light day
temperature minus (1-dt)*(temp. amplitude)

```

```

# 0, if no grid-output is needed, else one of the codes
# statistic for subcatchments (zones) of the real snow
# result grid for pot. interception evaporation in
# 0, if no grid-output is needed, else one of the codes
# statisticfile for zones of pot. interception
# statistic for subcatchments (zones) of the corrected
# coefficients c for Polynom of order 3 RG = c1 + c2*SSD
# coefficients x for Polynom of order 3 SSD = x1 + x2*RG
# Extinktion coefficient for RG-modeling (Phi and
# recession constant (e-function for recession of the
# part of the temperature amplitude (dt), that is added
# (followed by the range of changing within a year
# in the night: mean night temperature is mean day

```

### [snow\_model]

```

1 # 0=ignore this module, 1 = run the module
$time # duration of a time step in minutes
1 # method 1=T-index, 2=t-u-index, 3=Anderson comb., 4=extended com.
1.0 # transient zone for rain-snow (T0R +- this range)
0.0 # T0R temperature limit for rain (Grad Celsius)
0.0 # T0 temperature limit snow melt
0.05 # CWH storage capacity of the snow for water (relative part)
1.0 # CRFR coefficient for refreezing
2.5 # C0 degree-day-factor mm/d/C
0.8 # C1 degree-day-factor without wind consideration mm/(d*C)
0.17 # C2 degree-day-factor considering wind mm/(d*C*m/s)

```

```

0.07      # z0      roughness length cm for energy balance methods (not used)
1.0      # RMFMIN minimum radiation melt factor      mm/d/C comb. method
2.5      # RMFMAX maximum radiation melt factor      mm/d/C comb. method
0.45     # Albedo for snow (Min)
0.90     # Albedo for snow (Max)

$outpath//$rain_rate      # rain rate
$Writegrid      # 0, if no grid-output is needed, else one of the codes
described above

$outpath//rain//$grid//.//$code//$year $once_per_interval # rain rate
$outpath//$snow_rate      # snow rate
$Writegrid      # 0, if no grid-output is needed, else one of the codes
described above

$outpath//snow//$grid//.//$code//$year $once_per_interval # snow rate
$outpath//$days_snow      # days with snow (SWE > 5mm)
$Writegrid      # 0, if no grid-output is needed, else one of the codes
described above

$outpath//sday//$grid//.//$code//$year $once_per_interval # days with snow (SWE > 5mm)
$outpath//$snow_age      # snow age (days without new snow)
$Writegrid      # 0, if no grid-output is needed, else one of the codes
described above

$outpath//sage//$grid//.//$code//$year $once_per_interval # days since last snowfall
$outpath//albe//$grid//.//$code//$year $once_per_interval # Albedo
$outpath//$snowcover_outflow # discharge from snow, input (precipitation) for
following modules
$Writegrid      # 0, if no grid-output is needed, else one of the codes
described above

$outpath//qsch//$grid//.//$code//$year $once_per_interval # melt (or rain, if there is no snow cover) in mm/dt
$outpath//$melt_from_snowcover # discharge from snow, input (precipitation) for
following modules
$Writegrid      # 0, if no grid-output is needed, else one of the codes
described above

$outpath//qsme//$grid//.//$code//$year $once_per_interval # melt flow in mm/dt
$outpath//$SSNOgrid      # name of the grids with the snow storage solid in mm
$Writegrid      # 0, if no grid-output is needed, else one of the codes
described above

$outpath//$SLIQgrid      # name of the grids with the snow storage liquid in
mm
$Writegrid      # 0, if no grid-output is needed, else one of the codes
described above

$outpath//ssto//$grid//.//$code//$year $once_per_interval # total snow storage, in mm, (liquid and solid
fraction)

```

```

$outpath//$SSTOgrid          # name of the grids with the total snow storage solid
AND liquid in mm
$Writegrid                  # 0, if no grid-output is needed, else one of the codes
described above
$readgrids                  # 1=read snow storage solid, liquid grids from disk,
0=generate new grids

```

### [ice\_firn]

```

0          # 0=ignore this module, method for glacier melt: 1=classical t-index, 2=t-index with correction by
radiation, 11 = dynamic glacier model with classical t-index, 12 = dynamic glacier model with radiation correction

```

### [permafrost]

```

0          # 0=ignore this module, method: 1=simple Alpha*sqrt(snow-free-days) approach to estimate thawdepth

```

### [interception\_model]

```

1          # 0=ignore this module, 1 = run the module
$time      # duration of a time step in minutes
2          # method: 1 = use ETP for calculating EI; 2 = use EIP for calculating
EI (only effective for method 1 in evapotranspiration model -> for other methods, ETP = EIP)
$outpath//$sthroughfall    # result grid : = outflow from the interception storage
$Writegrid                 # 0, if no grid-output is needed, else one of the codes described above
$outpath//$qi__//$grid//.//$code//$year $once_per_interval # statistic file interception storage outflow
$outpath//$EIgrid          # Interzeption evaporation, grid
$Writegrid                 # 0, if no grid-output is needed, else one of the codes described above
$outpath//$ei__//$grid//.//$code//$year $once_per_interval # zonal statistic
$outpath//$SIgrid          # storage content of the interception storage
$Writegrid                 # 0, if no grid-output is needed, else one of the codes described above
$outpath//$si__//$grid//.//$code//$year $once_per_interval # zonal statistic For interception storage content
0.35                     # layer thickness of the waters on the leaves (multiplied with LAI ->
storage capacity)
$readgrids                 # 1=read grids from disk, else generate internal

```

### [infiltration\_model]

```

1          # 0=ignore this module, 1 = run the module
$time      # duration of a time step in minutes
$outpath//$INFEXgrid       # grid with infiltration excess in mm (surface runoff)
$Writegrid                 # for surface discharge (fraction 1)
$outpath//$infx//$grid//.//$code//$year $once_per_interval # statistic file for the infiltration excess
$outpath//$SATgrid         # grid with code 1=saturation at interval start, 0 =no saturation.
$Writegrid                 # Writegrid for saturation code grids

```

```

0.1                # fraction of reinfitrating water (of the infiltration excess)

$set $SDISPgrid      = sdis//$grid//.//$suffix
$set $RPAUSgrid      = paus//$grid//.//$suffix
$set $EKIN_grid      = ekin//$grid//.//$suffix
$set $TSBB_grid      = tsbb//$grid//.//$suffix
$set $QDSU_grid      = qdsu//$grid//.//$suffix

[SiltingUpModel] # FR
0                # 0=ignore this module, 1 = run the module

[SurfaceRoutingModel] # FR
0                # 0=ignore this module, 1 = run the module

[lake_model] # FR
0                # 0=ignore this module, 1 = run the module

[unsatzon_model]
1                # 0=ignore this module, 1 = run the module
$time           # duration of a time step in minutes
3               # method, 1=simple method (will not work anymore from version 7.x), 2 = FDM-Method 3 = FDM-Method with dynamic
time step down to 1 secound
0               # controlling interaction with surface water: 0 = no interaction, 1 = exfiltration possible 2 = infiltration
and exfiltration possible
0               # controlling surface storage in ponds:          0 = no ponds,          1 = using ponds for surface storage (pond
depth as standard grid needed -> height of dams around fields)
0               # controlling artificial drainage:              0 = no artificial drainage 1 = using drainage (drainage depth
and horizontal pipe distances as standard grids needed!)
0               # controlling clay layer:                      0 = no clay layer,   1 = assuming a clay layer in a depth,
specified within a clay-grid (declared as a standard grid)
5e-8           # permeability of the clay layer (is used for the clay layer only)
2               # parameter for the initialization of the gw_level (range between 1..levels (standard: 4)) 4 means: the
upper 1/4th of the layers is unsaturated
$outpath//qdra//$grid//.//$code//$year $once_per_interval # results drainage discharge in mm per zone
$outpath//gwst//$grid//.//$code//$year $once_per_interval # results groundwater depth
$outpath//gwn_//$grid//.//$code//$year $once_per_interval # results mean groundwater recharge per zone
$outpath//sb05//$grid//.//$code//$year $once_per_interval # results rel. soil moisture within the root zone per
zone
$outpath//sb1_//$grid//.//$code//$year $once_per_interval # results rel. soil moisture within the unsat. zone
(0m..GW table) per zone

```

```

$outpath//wurz//$grid//.//$code//$year $once_per_interval # results statistic of the root depth per zone
$outpath//infx//$grid//.//$code//$year $once_per_interval # results statistic of the infiltration excess
$outpath//pond//$grid//.//$code//$year $once_per_interval # results statistic of the ponding water storage
content
$outpath//qdir//$grid//.//$code//$year $once_per_interval # results statistic of the direct discharge
$outpath//qifl//$grid//.//$code//$year $once_per_interval # results statistic of the interflow
$outpath//qbas//$grid//.//$code//$year $once_per_interval # results statistic of the baseflow
$outpath//qges//$grid//.//$code//$year $once_per_interval # results statistic of the total discharge
$outpath//gwin//$grid//.//$code//$year $once_per_interval # statistic of the infiltration from surface water
into groundwater (from rivers and lakes)
$outpath//gwex//$grid//.//$code//$year $once_per_interval # statistic of the exfiltration from groundwater into
surface water (into rivers and lakes)
$outpath//macr//$grid//.//$code//$year $once_per_interval # statistic of infiltration into macropores
$outpath//qinf//$grid//.//$code//$year $once_per_interval # statistic of total infiltration into the first soil
layer
$outpath//$SB_1_grid # grid with actual soil water content for the root zone
$Writegrid # Writecode for this grid
$outpath//$SB_2_grid # grid with actual soil water content for the entire unsaturated zone
$Writegrid # Writecode for this grid
$outpath//$ROOTgrid # grid with root depth
$Writegrid # Writecode for this grid
$outpath//$Thetastack # stack, actual soil water content for all soil levels
$Writegrid # Writecode for this stack
$outpath//$hydraulic_heads_stack # stack, containing hydraulic heads
$Writestack # Writecode for this stack
$outpath//$geodetic_altitude_stack # stack, containig geodaetic altitudes of the soil levels (lower boudaries)
$Writestack # Writecode for this stack
$outpath//$flowstack # stack, containing the outflows from the soil levels
$Writestack # Writecode for this stack
$outpath//$GWdepthgrid # grid with groudwaterdepth
$Writegrid # Writecode for this grid
$outpath//$GWthetagrid # grid with theta in GWLEVEL
$Writegrid # Writecode for this grid
$outpath//$GWNgrid # grid with groundwater recharge
$Writegrid # Writecode for this grid
$outpath//$GWLEVELgrid # grid with level index of groundwater surface (Index der Schicht)
$Writegrid # Writecode for this grid
$outpath//$QDRAINgrid # grid with the drainage flows
$Writegrid # Writecode for this grid
$outpath//$SATgrid # grid with code 1=saturation at interval start, 0 no sat.
$Writegrid # Writecode for this grid

```

```

$outpath//$INFEXgrid      # grid with infiltration excess in mm (surface discharge)
$Writegrid               # Writecode for this grid
$outpath//$QDgrid        # grid with direct discharge
1//$Writegrid            # Writecode for this grid
$outpath//$QIgrid        # grid with Interflow
1//$Writegrid            # Writecode for this grid
$outpath//$QBgrid        # grid with baseflow
1//$Writegrid            # Writecode for this grid
$outpath//$GWINgrid      # grid with infiltration from rivers into the soil (groundwater)
1//$Writegrid            # Writecode for this grid
$outpath//$GWEXgrid      # grid with exfiltration (baseflow) from groundwater (is only generated, if
groundwater module is active, else baseflow is in QBgrid)
1//$Writegrid            # Writecode for this grid
$outpath//$act_pond_grid # grid with content of ponding storge
$Writegrid               # Writecode for this grid
$outpath//$UPRISEgrid    # grid with amount of capillary uprise (mm)
1//$Writegrid            # Writecode for this grid
$outpath//$PERCOLgrid    # grid with amount of percolation (mm)
1//$Writegrid            # writegrid for this grid
$outpath//$MACROINFgrid  # grid with amount of infiltration into macropores (mm)
1//$Writegrid            # Writecode for this grid
$outpath//$irrig_grid    # grid with irrigation amount (will be written when irrigation is used, only)
$Writegrid               # writegrid for this grid (however: will be written when irrigation is used,
only)
2 2                      # coordinates of control plot, all theta and qu-values are written to files
(qu.dat, theta.dat in the directory, from which the model is started)
$outpath//qbot//$grid//.$code//$year      # name of a file containing the flows between the layers of the control
point
$outpath//thet//$grid//.$code//$year      # name of a file containing the soil moisture as theta values of the
layers of the control point
$outpath//hhyd//$grid//.$code//$year      # name of a file containing the hydraulic head of the layers of the
control point
$outpath//otherdata//$grid//.$code//$year # name of a file containing some other water balance data of the control
point (non layer data)
$outpath//etrd//$grid//.$code//$year      # name of a file containing the withdrawal of soil water for each layer
for the control point (due to transpiration)
$outpath//intd//$grid//.$code//$year      # name of a file containing the interflow for the soil layers of the
control point
#Port   Branson Sion/R   Brig/R   Visp/V   Marti/D LeChab   Reck/R   Blatt/M Aigle   Blatt/L Brig/S   Gletsch ZEG
      ZEG/L   Lötsch Lake   # subbasins
10 # codes of the subbasins (in the subbasin grid)

```



```

$kd1      # kd
$ki1      # ki
$dr1      # dr
4         # k in qb = Q0 * exp(-k/z) with z = depth to groundwater
8         # Q0 in the above formula
$sdf1     # fraction of surface runoff on snow melt
$readgrids      # meanings are extended now! read the following comments
$outpath//storage_richards.ftz      # if readgrids = 1, then this file contains the contents of the flow travel
time zones for interflow and surface flow and for the tracers
36        # minimum dynamic time step in seconds. the smaller this number, the longer
the model runs but the results will be more accurate due to a maintained Courant condition
$outpath//step//$grid//.//$code//$year $once_per_interval  # results statistic of the number of substeps
$outpath//$SUBSTEPSgrid      # grid with number of substeps --> a good idea is to use writecode 5x (e.g.
53) to get the average number of substeps per cell for the model run
$Writegrid      # for substeps, the areal distribution is of interest for the annual average
value. This is code 6 as first digit in 2-digit codes. Or use 5 for the entire model run

```

#### [heat\_transfer]

```

0          # 0 = do not model heat transfer, 1 = heat transfer is modelled

```

#### [ExternalCoupling]

```

0          # 0 = no coupling, 1=coupling

```

#### [irrigation]

```

0          # 0=ignore this module, 1 = run the module

```

#### [groundwater\_flow] # FR

```

0          # 0=ignore the module, 1 = run the module

```

#### [soil\_model]

```

0          # 0=ignore this module, 1 = run the module

```

#### [routing\_model]

```

0          # 0=ignore this module, 1 = run the module, 2=run the module with observed
inflows into the routing channels (from discharge files)

```

```

# declaring some common variables for vegetation period dependent grid-writing
# default (if not used in land use table at all) is JDVegReset = 1 and JDVegWrite = 365
$set $JDVegReset = 1

```

[multilayer landuse]

```
1 SRC_Reiff { Landuse_Layers = 101, -9999; k_extinct = 0.3; LAI_scale = 20;}
```

```
# description of landuse, all 8 simulations are defined according to the "VersionNames" in Tabel 3
```

# LAI2000 Rsc40

```
JulDays      =      15      120      121      134      140      150      166      178      186      190
```

197      213      228      235      238      246      260      270      277      292      293      349 ;

Albedo = 0.17 0.17 0.17 0.18 0.18 0.18 0.18 0.18 0.18 0.18

[illegible]

rsc = 200 200 40 40 40 40 40 40 40 40

[illegible]

```
rs_evaporation = 750 750 750 800 800 800 800 800 800 800
```

**800      800      800      800      800      800      800      800      800      800      750 ;**

|     |   |   |   |      |      |      |      |      |      |      |      |
|-----|---|---|---|------|------|------|------|------|------|------|------|
| LAI | = | 1 | 1 | 1.02 | 1.89 | 2.03 | 2.43 | 2.97 | 3.34 | 3.73 | 4.45 |
|-----|---|---|---|------|------|------|------|------|------|------|------|

4.74 5.45 5.41 4.83 4.17 3.70 3.30 3.02 2.68 1.65 1 1 ;

$$Z_0 = 0.74 \quad 0.74$$
[illegible][illegible][illegible][illegible]

1.0 1.0 1.0 1.0 1.0 1.0 1.0 1.0 1.0 1.0 1.0 1.0 ;

AltDep = 0.025 0.025 0.025 0.025 0.025 0.025 0.025 0.025 0.025 0.025 0.025

0.025 0.025 0.025 0.025 0.025 0.025 0.025 0.025 0.025 0.025 0.025

[illegible][illegible]

1.0 1.0 1.0 1.0 1.0 1.0 1.0 1.0 1.0 1.0 1.0 1.0 ;

```

    }
# LAI2000 Rsc80
102 poplar_SRC_13 {method      = VariableDayCount; # DynamicPhenology_4;
    RootDistr      = 1;      # [-1: konkav, 0: linear, >1: konvex]
    TReduWet        = 1;      # relative Theta value for beginning oxygen stress (under wet conditions
-> set >= 1 for crop which doesn't depend on an aeral zone
    LimitReduWet    = 0.5;    # minimum relative reduction factor of real transpiration when water
content reaches saturation. The reduction factor value will go down linearly starting at 1.0 when relative Theta
equals TReduWet (e.g. 0.95) to LimitReduWet when the soil is saturated (Theta rel = 1.0)
    HReduDry        = 3.45;    # hydraulic head (suction) for beginning dryness stress (for water content
resulting in higher suctions, ETR will be reduced down to 0 at suction=150m)
    IntercepCap      = 0.3;    # optional: specific thickness of the water layer on the leafes in mm. if
omitted here, the dedfault parameter from interception_model is used
    JulDays          = 15      120      121      134      140      150      166      178      186      190
197      213      228      235      238      246      260      270      277      292      293      349      ;
    Albedo           = 0.17 0.17 0.17 0.18 0.18 0.18 0.18 0.18 0.17 0.17 0.17 0.18 0.18
0.18 0.18 0.18 0.18 0.18 0.18 0.18 0.18 0.18 0.17 0.17 0.17 ;
    rsc              = 200 200 80 80 80 80 80 80 80 80 80 80 80
80 80 80 80 80 80 80 80 80 200 200 ;
    rs_evaporation    = 750 750 750 800 800 800 800 800 800 800 800 750 ;
800 800 800 800 800 800 800 800 800 800 750 ;
    LAI              = 1 1 1.02 1.89 2.03 2.43 2.97 3.34 3.73 4.45
4.74 5.45 5.41 4.83 4.17 3.70 3.30 3.02 2.68 1.65 1 1 ;
    Z0               = 0.74 0.74 0.74 0.74 0.74 0.74 0.74 0.74 0.74 0.74 0.74 0.74 0.74
0.74 0.74 0.74 0.74 0.74 0.74 0.74 0.74 0.74 0.74 0.74 ;
    VCF              = 0.65 0.8 0.8 0.9 0.9 0.9 0.9 0.9 0.85 0.85 0.65 ;
0.95 0.95 0.95 0.95 0.95 0.95 0.9 0.9 0.9 0.85 0.85 0.65 ;
    RootDepth        = 1.0 1.0 1.0 1.0 1.0 1.0 1.0 1.0 1.0 1.0 1.0 1.0 1.0
1.0 1.0 1.0 1.0 1.0 1.0 1.0 1.0 1.0 1.0 1.0 ;
    AltDep           = 0.025 0.025 0.025 0.025 0.025 0.025 0.025 0.025 0.025 0.025 0.025 0.025
-0.025 -0.025 -0.025 -0.025 -0.025 -0.025 -0.025 -0.025 -0.025 -0.025 -0.025 ;
    n-factor         = 1.0 1.0 1.0 1.0 1.0 1.0 1.0 1.0 1.0 1.0 1.0 1.0 1.0
1.0 1.0 1.0 1.0 1.0 1.0 1.0 1.0 1.0 1.0 1.0 ;
    }
# LI191SA Rsc40
103 poplar_SRC_13 {method      = VariableDayCount; # DynamicPhenology_4;
    RootDistr      = 1;      # [-1: konkav, 0: linear, >1: konvex]
    TReduWet        = 1;      # relative Theta value for beginning oxygen stress (under wet conditions
-> set >= 1 for crop which doesn't depend on an aeral zone
    LimitReduWet    = 0.5;    # minimum relative reduction factor of real transpiration when water
content reaches saturation. The reduction factor value will go down linearly starting at 1.0 when relative Theta

```

```

equals TReduWet (e.g. 0.95) to LimitReduWet when the soil is saturated (Theta rel = 1.0)
      HReduDry                = 3.45; # hydraulic head (suction) for beginning dryness stress (for water content
resulting in higher suctions, ETR will be reduced down to 0 at suction=150m)
      IntercepCap             = 0.3; # optional: specific thickness of the water layer on the leafes in mm. if
omitted here, the dedfault parameter from interception_model is used
      JulDays                 = 15    133    134    166    178    186    197    213    228    235
238    246    260    270    277    292    293    349 ;
      Albedo                  = 0.17  0.17  0.18  0.18  0.18  0.18  0.18  0.18  0.18  0.18
0.18    0.18    0.18    0.18    0.18  0.17  0.17  0.17  0.17 ;
      rsc                     = 200   200   40    40    40    40    40    40    40    40
40     40     40     40     40    40    200   200 ;
      rs_evaporation          = 750   750   800   800   800   800   800   800   800   800
800    800    800    800   800   800   800   750 ;
      LAI                     = 1     1     1.19  2.45  2.64  2.92  3.43  3.91  5.72  4.93
3.85    3.18    2.72  2.43  2.43  1.31    1     1 ;
      Z0                     = 0.74  0.74  0.74  0.74  0.74  0.74  0.74  0.74  0.74  0.74
0.74    0.74    0.74  0.74  0.74  0.74  0.74  0.74 ;
      VCF                     = 0.65  0.8   0.9   0.95  0.95  0.95  0.95  0.95  0.95  0.95
0.95    0.95    0.9   0.9   0.9   0.85  0.7   0.65 ;
      RootDepth               = 1.0   1.0   1.0   1.0   1.0   1.0   1.0   1.0   1.0   1.0
1.0     1.0     1.0   1.0   1.0   1.0   1.0   1.0 ;
      AltDep                  = 0.025 0.025 0.025 0.025 0.025 0.025 -0.025 -0.025 -0.025 -0.025
-0.025 -0.025 -0.025 -0.025 -0.025 -0.025 -0.025 -0.025 ;
      n-factor                = 1.0   1.0   1.0   1.0   1.0   1.0   1.0   1.0   1.0   1.0
1.0     1.0     1.0   1.0   1.0   1.0   1.0   1.0 ;
    }
# LI191SA Rsc80
104 poplar_SRC_13 {method      = VariableDayCount; # DynamicPhenology_4;
      RootDistr               = 1;    # [-1: konkav, 0: linear, >1: konvex]
      TReduWet                 = 1;    # relative Theta value for beginning oxygen stress (under wet conditions
-> set >= 1 for crop which doesn't depend on an aeral zone
      LimitReduWet             = 0.5; # minimum relative reduction factor of real transpiration when water
content reaches saturation. The reduction factor value will go down linearly starting at 1.0 when relative Theta
equals TReduWet (e.g. 0.95) to LimitReduWet when the soil is saturated (Theta rel = 1.0)
      HReduDry                = 3.45; # hydraulic head (suction) for beginning dryness stress (for water content
resulting in higher suctions, ETR will be reduced down to 0 at suction=150m)
      IntercepCap             = 0.3; # optional: specific thickness of the water layer on the leafes in mm. if
omitted here, the dedfault parameter from interception_model is used
      JulDays                 = 15    133    134    166    178    186    197    213    228    235
238    246    260    270    277    292    293    349 ;
      Albedo                  = 0.17  0.17  0.18  0.18  0.18  0.18  0.18  0.18  0.18  0.18

```

```

0.18    0.18    0.18    0.18    0.18    0.17    0.17    0.17    ;
      rsc      =    200    200    80    80    80    80    80    80
80      80      80      80      80      80      200    200    ;
      rs_evaporation =    750    750    800    800    800    800    800    800
800      800      800      800      800      800      800    750    ;
      LAI      =    1    1    1.19    2.45    2.64    2.92    3.43    3.91    5.72    4.93
3.85    3.18    2.72    2.43    2.43    1.31    1    1    ;
      Z0      =    0.74    0.74    0.74    0.74    0.74    0.74    0.74    0.74    0.74    0.74
0.74    0.74    0.74    0.74    0.74    0.74    0.74    0.74    ;
      VCF      =    0.65    0.8    0.9    0.95    0.95    0.95    0.95    0.95    0.95    0.95
0.95    0.95    0.9    0.9    0.9    0.85    0.7    0.65    ;
      RootDepth =    1.0    1.0    1.0    1.0    1.0    1.0    1.0    1.0    1.0    1.0
1.0      1.0      1.0      1.0      1.0    1.0    1.0    1.0    ;
      AltDep    = 0.025    0.025    0.025    0.025    0.025    0.025    -0.025    -0.025    -0.025    -0.025
-0.025   -0.025   -0.025   -0.025   -0.025   -0.025   -0.025   -0.025    ;
      n-factor  =    1.0    1.0    1.0    1.0    1.0    1.0    1.0    1.0    1.0    1.0
1.0      1.0      1.0      1.0      1.0    1.0    1.0    1.0    ;
    }
# LAIstep Rsc40 Max1
105 poplar_SRC_13 {method = DynamicPhenology_4;
      RootDistr = 1; # [-1: konkav, 0: linear, >1: konvex]
      TReduWet = 1; # relative Theta value for beginning oxygen stress (under wet conditions
-> set >= 1 for crop which doesn't depend on an aeral zone
      LimitReduWet = 0.5; # minimum relative reduction factor of real transpiration when water
content reaches saturation. The reduction factor value will go down linearly starting at 1.0 when relative Theta
equals TReduWet (e.g. 0.95) to LimitReduWet when the soil is saturated (Theta rel = 1.0)
      HReduDry = 3.45; # hydraulic head (suction) for beginning dryness stress (for water content
resulting in higher suctions, ETR will be reduced down to 0 at suction=150m)
      IntercepCap = 0.3; # optional: specific thickness of the water layer on the leafes in mm. if
omitted here, the dedfault parameter from interception_model is used
      F* = 175; # "Temperatursum" which must be exceeded for starting the phenological
cycle (unfolding leaves)
      DP1_t1_dorm = 32; # starting day (julian day number), forcing units will be summed up after
this day of year
      DP1_T_Bf = 0; # threshold temperatur for a positive forcing unit after Model 12b (thermal
time model)
      DP4_t0_dorm = 304; # November, 1st=304/305 # starting day (julian day number), chilling units
will be summed up after this day of year
      DP4_t1_dorm = 32; # February 2nd=32 # starting day (julian day number), forcing units will
be summed up after this day of year
      DP4_T0 = 10; # threshold temperatur for chilling units (if T < T0)

```

```

DP4_Tl           = 2;      # threshold temperatur for forcing units (T > Tl)
DP4_Par_a        = 2200;   # tree specific parameter
DP4_Par_b        = -403;   # tree specific parameter
DP4_T_xylstop    = 8;      # threshold temperature, the moving average of temperature has to stay below
for 5 days in order to start leave fall
DP4_t_xsl        = 243;    # 183; # time of year (julian day number), the moving average analysis
starts from (for start leave fall estimation)
DP4_SPSLF        = 6;      # 10; # (SamplePointStartLeaveFall) sample point ID which is replaced
by the day of start leave fall with the original value as latest time
JDReset_TStart   = 1;      # Julian Day when TStart is reset to -1 and Forcing untis are reset to 0
for a new vegetation period
maxStartJDforDP1 = 150;    # latest start day for the model run to use DynamicPhenology_1. If start
date is after this date, then TStart is set to maxStartJDforDP1 minus the delta of the next column (e.g. 150 - 18
= 132), so we assume that this start date meets a fully developed vegetation. If start day is even after DP2_t0_dorm,
then the next year will use DP1 only
JulDays          = 15      -1      +1      150      258      287      288      349      ;
Albedo           = 0.17    0.17    0.17    0.175    0.18    0.175    0.17    0.17      ;
rsc              = 200     200     40      40      40      40      200     200      ;
rs_evaporation   = 750     750     750     750     800     800     750     750      ;
LAI              = 1       1       6       6       6       6       1       1       ;
Z0               = 0.74    0.74    0.74    0.74    0.74    0.74    0.74    0.74      ;
VCF              = 0.65    0.7     0.7     0.95    0.95    0.8     0.8     0.65      ;
RootDepth        = 1.0     1.0     1.0     1.0     1.0     1.0     1.0     1.0      ;
AltDep           = 0.025    0       0       0.025   -0.025    0      -0.025   -0.025     ;
n-factor         = 1.0     1.0     1.0     1.0     1.0     1.0     1.0     1.0      ;
}
# LAIstep Rsc40 IPG235
106 poplar_SRC_13 {method      = DynamicPhenology_4;
RootDistr         = 1;        # [-1: konkav, 0: linear, >1: konvex]
TReduWet          = 1;        # relative Theta value for beginning oxygen stress (under wet conditions
-> set >= 1 for crop which doesn't depend on an aeral zone
LimitReduWet      = 0.5;      # minimum relative reduction factor of real transpiration when water
content reaches saturation. The reduction factor value will go down linearly starting at 1.0 when relative Theta
equals TReduWet (e.g. 0.95) to LimitReduWet when the soil is saturated (Theta rel = 1.0)
HReduDry          = 3.45;     # hydraulic head (suction) for beginning dryness stress (for water content
resulting in higher suctions, ETR will be reduced down to 0 at suction=150m)
IntercepCap       = 0.3;      # optional: specific thickness of the water layer on the leafes in mm. if
omitted here, the dedfault parameter from interception_model is used
F*                = 175;      # "Temperatursum" which must be exceeded for starting the phenological
cycle (unfolding leaves)
DP1_t1_dorm       = 32;       # starting day (julian day number), forcing units will be summed up after

```

```

this day of year
DP1_T_Bf          = 0;      # threshold temperatur for a positive forcing unit after Model 12b (thermal
time model)
DP4_t0_dorm        = 304;    # November, 1st=304/305 # starting day (julian day number), chilling units
will be summed up after this day of year
DP4_t1_dorm        = 32;     # February 2nd=32 # starting day (julian day number), forcing units will
be summed up after this day of year
DP4_T0             = 8;      # threshold temperatur for chilling units (if T < T0)
DP4_T1             = 5;      # threshold temperatur for forcing units (T > T1)
DP4_Par_a          = 1693.4161; # tree specific parameter
DP4_Par_b          = -301.9361; # tree specific parameter
DP4_T_xylstop      = 8;      # threshold temperature, the moving average of temperature has to stay below
for 5 days in order to start leave fall
DP4_t_xs1          = 243;    # 183; # time of year (julian day number), the moving average analysis
starts from (for start leave fall estimation)
DP4_SPSLF          = 6;      # 10; # (SamplePointStartLeaveFall) sample point ID which is replaced
by the day of start leave fall with the original value as latest time
JDReset_TStart     = 1;      # Julian Day when TStart is reset to -1 and Forcing untis are reset to 0
for a new vegetation period
maxStartJDforDP1   = 150;    # latest start day for the model run to use DynamicPhenology_1. If start
date is after this date, then TStart is set to maxStartJDforDP1 minus the delta of the next column (e.g. 150 - 18
= 132), so we assume that this start date meets a fully developed vegetation. If start day is even after DP2_t0_dorm,
then the next year will use DP1 only
JulDays            = 15      -1      +1      150      258      287      288      349      ;
Albedo             = 0.17    0.17    0.17    0.175    0.18    0.175    0.17    0.17      ;
rsc                = 200     200     40      40      40      40      200     200      ;
rs_evaporation     = 750     750     750     750     800     800     750     750      ;
LAI                = 1       1       6       6       6       6       1       1       ;
Z0                 = 0.74    0.74    0.74    0.74    0.74    0.74    0.74    0.74      ;
VCF                = 0.65    0.7     0.7     0.95    0.95    0.8     0.8     0.65      ;
RootDepth          = 1.0     1.0     1.0     1.0     1.0     1.0     1.0     1.0      ;
AltDep             = 0.025    0       0       0.025   -0.025    0     -0.025   -0.025      ;
n-factor           = 1.0     1.0     1.0     1.0     1.0     1.0     1.0     1.0      ;
}
# LAIadjusted Rsc40adjusted Max1
107 poplar_SRC_13 {method      = DynamicPhenology_4;
RootDistr          = 1;      # [-1: konkav, 0: linear, >1: konvex]
TReduWet           = 1;      # relative Theta value for beginning oxygen stress (under wet conditions
-> set >= 1 for crop which doesn't depend on an aeral zone
LimitReduWet       = 0.5;    # minimum relative reduction factor of real transpiration when water
content reaches saturation. The reduction factor value will go down linearly starting at 1.0 when relative Theta

```

equals TReduWet (e.g. 0.95) to LimitReduWet when the soil is saturated (Theta rel = 1.0)  
 HReduDry = **3.45**; # hydraulic head (suction) for beginning dryness stress (for water content  
 resulting in higher suctions, ETR will be reduced down to 0 at suction=150m)  
 IntercepCap = **0.3**; # optional: specific thickness of the water layer on the leafes in mm. if  
 omitted here, the default parameter from interception\_model is used  
 F\* = **175**; # "Temperatursum" which must be exceeded for starting the phenological  
 cycle (unfolding leaves)  
 DP1\_t1\_dorm = **32**; # starting day (julian day number), forcing units will be summed up after  
 this day of year  
 DP1\_T\_Bf = **0**; # threshold temperatur for a positive forcing unit after Model 12b (thermal  
 time model)  
 DP4\_t0\_dorm = **304**; # November, 1st=304/305 # starting day (julian day number), chilling units  
 will be summed up after this day of year  
 DP4\_t1\_dorm = **32**; # February 2nd=32 # starting day (julian day number), forcing units will  
 be summed up after this day of year  
 DP4\_T0 = **10**; # threshold temperatur for chilling units (if T < T0)  
 DP4\_T1 = **2**; # threshold temperatur for forcing units (T > T1)  
 DP4\_Par\_a = **2200**; # tree specific parameter  
 DP4\_Par\_b = **-403**; # tree specific parameter  
 DP4\_T\_xylstop = **8**; # threshold temperature, the moving average of temperature has to stay below  
 for 5 days in order to start leave fall  
 DP4\_t\_xsl = **243**; # 183; # time of year (julian day number), the moving average analysis  
 starts from (for start leave fall estimation)  
 DP4\_SPSLF = **9**; # (SamplePointStartLeaveFall) sample point ID which is replaced by the day  
 of start leave fall with the original value as latest time  
 JDReset\_TStart = **1**; # Julian Day when TStart is reset to -1 and Forcing untis are reset to 0  
 for a new vegetation period  
 maxStartJDforDP1 = **150**; # latest start day for the model run to use DynamicPhenology\_1. If start  
 date is after this date, then TStart is set to maxStartJDforDP1 minus the delta of the next column (e.g. 150 - 18  
 = 132), so we assume that this start date meets a fully developed vegetation. If start day is even after DP2\_t0\_dorm,  
 then the next year will use DP1 only  
 JulDays = **15 46 -1 +20 166 196 227 258 288 319 349** ;  
 Albedo = **0.17 0.17 0.17 0.17 0.18 0.18 0.18 0.18 0.175 0.17 0.17** ; #  
 Albedo (snow free)  
 rsc = **200 200 150 60 40 40 40 60 60 200 200** ; # leaf  
 surface resistance in s/m  
 rs\_evaporation = **750 750 750 750 800 800 800 800 800 750 750** ; # SOIL  
 surface resistance in s/m (for evaporation only) [150 ...250 s/m]  
 LAI = **1 1 2 3.5 5 6 6 5 3 1 1** ; # Leaf  
 Area Index (1/1)  
 Z0 = **0.74 0.74 0.74 0.74 0.74 0.74 0.74 0.74 0.74 0.74 0.74** ; #



```

Roughness length in m # FR z0=0.123*h (0.123*6m=0.74)
    VCF          = 0.65 0.65 0.7 0.8 0.95 0.95 0.95 0.9 0.85 0.65 0.65 ; #
Vegetation covered fraction ("Vegetationsbedeckungsgrad")
    RootDepth    = 1.0 1.0 1.0 1.0 1.0 1.0 1.0 1.0 1.0 1.0 1.0 ; # Root
depth in m
    AltDep       = 0.025 0.025 0 0 0.025 -0.025 -0.025 -0.025 0 -0.025 -0.025 ; #
Verschiebung des Juldays pro Meter (positiv: wird nach hinten geschoben, negativ: wird nach vorne geschoben -> Limit:
Wenn zwei Punkte aufeinandertreffen, dann wird nicht weiter verschoben). Parameter beziehen sich auf 400m.ü.NN

    n-factor     = 1.0 1.0 1.0 1.0 1.0 1.0 1.0 1.0 1.0 1.0 1.0 ;
}
# LAIadjusted Rsc40adjusted IPG235
108 poplar_SRC_13 {method      = DynamicPhenology_4;
    RootDistr      = 1;      # [-1: konkav, 0: linear, >1: konvex]
    TReduWet       = 1;      # relative Theta value for beginning oxygen stress (under wet conditions
-> set >= 1 for crop which doesn't depend on an aeral zone
    LimitReduWet   = 0.5;    # minimum relative reduction factor of real transpiration when water
content reaches saturation. The reduction factor value will go down linearly starting at 1.0 when relative Theta
equals TReduWet (e.g. 0.95) to LimitReduWet when the soil is saturated (Theta rel = 1.0)
    HReduDry       = 3.45;   # hydraulic head (suction) for beginning dryness stress (for water content
resulting in higher suctions, ETR will be reduced down to 0 at suction=150m)
    IntercepCap    = 0.3;    # optional: specific thickness of the water layer on the leafes in mm. if
omitted here, the default parameter from interception_model is used
    F*             = 175;    # "Temperatursum" which must be exceeded for starting the phenological
cycle (unfolding leaves)
    DP1_t1_dorm    = 32;     # starting day (julian day number), forcing units will be summed up after
this day of year
    DP1_T_Bf       = 0;     # threshold temperatur for a positive forcing unit after Model 12b (thermal
time model)
    DP4_t0_dorm    = 304;    # November, 1st=304/305 # starting day (julian day number), chilling units
will be summed up after this day of year
    DP4_t1_dorm    = 32;     # February 2nd=32 # starting day (julian day number), forcing units will
be summed up after this day of year
    DP4_T0         = 8;      # threshold temperatur for chilling units (if T < T0)
    DP4_T1         = 5;      # threshold temperatur for forcing units (T > T1)
    DP4_Par_a      = 1693.4161; # tree specific parameter
    DP4_Par_b      = -301.9361; # tree specific parameter
    DP4_T_xylstop  = 8;      # threshold temperature, the moving average of temperature has to stay below
for 5 days in order to start leave fall
    DP4_t_xs1      = 243;    # 183; # time of year (julian day number), the moving average analysis
starts from (for start leave fall estimation)

```

```

DP4_SPSLF          = 9;      # (SamplePointStartLeaveFall) sample point ID which is replaced by the day
of start leave fall with the original value as latest time
JDRreset_TStart    = 1;      # Julian Day when TStart is reset to -1 and Forcing untis are reset to 0
for a new vegetation period
maxStartJDforDP1   = 150;    # latest start day for the model run to use DynamicPhenology_1. If start
date is after this date, then TStart is set to maxStartJDforDP1 minus the delta of the next column (e.g. 150 - 18
= 132), so we assume that this start date meets a fully developed vegetation. If start day is even after DP2_t0_dorm,
then the next year will use DP1 only
JulDays            = 15    46    -1    +20   166   196   227   258   288   319   349   ;
Albedo              = 0.17  0.17  0.17  0.17  0.18  0.18  0.18  0.18  0.175 0.17  0.17  ; #
Albedo (snow free)
rsc                 = 200   200   150   60    40    40    40    60    60    200   200   ; # leaf
surface resistance in s/m
rs_evaporation      = 750   750   750   750   800   800   800   800   800   750   750   ; # SOIL
surface resistance in s/m (for evaporation only) [150 ...250 s/m]
LAI                 = 1     1     2     3.5   5     6     6     5     3     1     1     ; # Leaf
Area Index (1/1)
Z0                  = 0.74  0.74  0.74  0.74  0.74  0.74  0.74  0.74  0.74  0.74  0.74  ; #
Roughness length in m # FR z0=0.123*h (0.123*6m=0.74)
VCF                  = 0.65  0.65  0.7   0.8   0.95  0.95  0.95  0.9   0.85  0.65  0.65  ; #
Vegetation covered fraction ("Vegetationsbedeckungsgrad")
RootDepth           = 1.0   1.0   1.0   1.0   1.0   1.0   1.0   1.0   1.0   1.0   1.0   ; # Root
depth in m
AltDep              = 0.025 0.025 0     0     0.025 -0.025 -0.025 -0.025 0     -0.025 -0.025 ; #
Verschiebung des Juldays pro Meter (positiv: wird nach hinten geschoben, negativ: wird nach vorne geschoben -> Limit:
Wenn zwei Punkte aufeinandertreffen, dann wird nicht weiter verschoben). Parameter beziehen sich auf 400m.ü.NN

n-factor            = 1.0   1.0   1.0   1.0   1.0   1.0   1.0   1.0   1.0   1.0   1.0   ;
}

$set $e3 = e-2
$set $e4 = e-3
$set $e5 = e-4
$set $e6 = e-5
$set $e7 = e-6
$set $e8 = e-7
$set $e9 = e-8
$set $e10 = e-9

```

[soil\_table]

```

1          # number of following entries
1 ReiffRef {method = MultipleHorizons;
          # max 11 default parameters SU_PAR00 to SU_PAR10 for silting up module. These parameters can be
used when defining expressions for inf_infinite(Y), energy(W), SDISP(Z), inf_start(X), and inf_pot(V) in method
3
          SU_PAR01 = 65.0;      # for method 3: parameter A in I_0 = A (initial infiltration capacity,
in method 0 defined as 65 mm/h)
          SU_PAR02 = 12.2;      # for method 3: parameter B in I_end = B*(dg^C)*(fd^D) (in method 0 defined
as 12.2)
          SU_PAR03 = 0.52;      # for method 3: parameter C in I_end = B*(dg^C)*(fd^D) (in method 0 defined
as 0.52)
          SU_PAR04 = -0.64;     # for method 3: parameter D in I_end = B*(dg^C)*(fd^D) (in method 0 defined
as -0.64)
          SU_PAR05 = 0.013;     # for method 3: parameter E in Cv = E*(fd^F)*(dg^G)*(t_cult^H) (in method
0 defined as 0.013)
          SU_PAR06 = -1.03;     # for method 3: parameter F in Cv = E*(fd^F)*(dg^G)*(t_cult^H) (in method
0 defined as -1.03)
          SU_PAR07 = 0.7;       # for method 3: parameter G in Cv = E*(fd^F)*(dg^G)*(t_cult^H) (in method
0 defined as 0.7)
          SU_PAR08 = -0.19;     # for method 3: parameter H in Cv = E*(fd^F)*(dg^G)*(t_cult^H) (in method
0 defined as -0.19)
#          FCap = 6.21; mSB = 38.5; ksat_topmodel = 8.25E-5; suction = 385; # optional parameters which are
needed for Topmodel only
          GrainSizeDist = 0.67 0.21 0.12; # optional: when using silting up model, the grain size
fractions for sand, silt, clay, (and Stones1..4 must be given here. Stones1 = 2-6.3mm, Stones2=6.3-20mm,
Stones3=20-63mm, Stones4=63-200mm.)
          PMacroThresh = 0.375 # precipitation capacity thresholding macropore runoff in
mm per hour (not in m/s, because it's more convenient than to write it down in m/s, e.g. 5mm/h = 1.38e-6)
          MacroCapacity = 0.125 # capacity of the macropores in mm per hour (not in m/s,
because it's more convenient than to write it down in m/s, e.g. 5mm/h = 1.38e-6)
          CapacityRedu = 0.7 # reduction of the macropore capacity with depth -> pores
become less dense. This Factor describes the reduction ratio per meter
          MacroDepth = 0.9 # maximum depth of the macropores
          KMinFrozenSoil = 1e-12 # minimum hydraulic conductivity in m/s when the soil is
completely frozen (do not set to zero, since the logarithm of this value is used internally)
          horizon = 1 2 3 ; # ID of the horizon (must be ascendent)
it's recommended to name the horizons shortly in the following row
          Name = Lu Ls3 Ls4 ; # short descriptions
          ksat = 2.5694e-5 1.9664e-5 1.6354e-5 ; # saturated hydraulic conductivity in
m/s # FR aus KA5 (2005)
          k_recession = 0.99 0.99 0.99 ; # k sat recession with depth (could also

```

```

be controlled by different layers if no k decrease is wanted (set this parameter to 1.0
    theta_sat      = 0.37      0.37      0.37      ;    # saturated water content (fillable
porosity in 1/1)
    theta_res      = 0.05      0.07      0.05      ;    # residual water content (in 1/1, water
content which cannot be poured by transpiration, only by evaporation)
    alpha          = 4.321     6.835     9.955      ;    # van Genuchten Parameter Alpha (small
values for silt of e.g. 0.5 to high values of e.g. 4 to 8 for sand, gravel and peat
    Par_n          = 1.16518   1.20501   1.18213    ;    # van Genuchten Parameter n (1.5 for silt
to 4.5 for gravel and peat)
    Par_tau        = 0.5       0.5       0.5       ;    # sog. Mualem-Parameter tau in der
van-Genuchten-Gleichung (dort normalerweise 0.5)
    thickness      = 0.05     0.1       0.1       ;    # thickness of each single numerical
layer in this horizon in m
    layers         = 6        6        12        ;    # numerical number of layers in this
horizon. The thickness of the layer is given by layers x thickness. All profiles must have an identical number of
layers (for memory handling reasons only)
}

```

**[substance\_transport]**

0

**[irrigation\_table]**

0 # number of following irrigation codes, per row one use

**[special\_output]** # FR

0 # 0=do not run this module, 1=run this module
