# Supplementary material for: How to predict hydrological effects of local land use change: how the vegetation parameterisation for short rotation coppices influences model results
Source: Copernicus journal article supplement (doi:10.5194/hess-19-3457-2015), 2015-08-07
Supplement: Supplementary file 2 [file hess-19-3457-2015-supplement.zip]

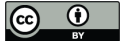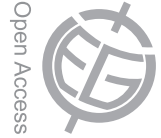

## *Supplement of*

# **How to predict hydrological effects of local land use change: how the vegetation parameterisation for short rotation coppices influences model results**

**F. Richter et al.**

*Correspondence to:* F. Richter ([falk.richter@forst.uni-goettingen.de](mailto:falk.richter@forst.uni-goettingen.de))

- [hess-19-3457-2015-supplement-title-page.pdf](#)
- [Controlfile\\_WaSim.ctl](#)
- [Controlfile\\_WaSim.pdf](#)
- [npp\\_userDefineLang\\_ctl.xml](#)

The copyright of individual parts of the supplement might differ from the CC-BY 3.0 licence.
